# Supplementary material
Source: MDPI journal article supplement (https://www.mdpi.com/2077-0472/12/10/1718)
Supplement: s1 [file s1]

---

**Table S1** The primer sequences for KASP markers used in this study

| Markes                        | Primer Seq Allele X        | Primer Seq Allele Y         | Primer Seq common             | Reference                        |
|-------------------------------|----------------------------|-----------------------------|-------------------------------|----------------------------------|
| <i>KASP14803</i>              | CAGACAACAAACACGTCCT<br>CAG | GCAGACAACAAACACGTCCT<br>CAA | CCAGTTCGGGATGTGAGAAACT<br>GTA | Fan et al., 2022                 |
| <i>KASP6A-21</i><br><i>21</i> | TGTGGTAGCAACACCTTTTC<br>A  | TGTGGTAGCAACACCTTTTCG       | TCGAATGACCAAAGCATACTAT<br>GT  | Liue et al., 2022                |
| <i>KASP3D32</i>               | CGGCATTCGTATCGCGCA         | CGGCCATTCGTATCGCGCG         | TCCGTCTATGCCCATGGTATTG        | Newly developed in this<br>study |
| <i>KASP4B61</i>               | CTTAACAACACTAGCCTAAT<br>A  | CTTAACAACACTAGCCTAATG       | ACAAAAAGACTATTCATACGCC<br>A   | Newly developed in this<br>study |

**Table S2 Phenotypic values for grain size related traits in the two parents and in the ZK-RIL population**

| Traits   | Environments | Year | Location | Parents  |       | ZK-RILs |       |       |      |        |          |            |             |
|----------|--------------|------|----------|----------|-------|---------|-------|-------|------|--------|----------|------------|-------------|
|          |              |      |          | ZKM138   | KCM2  | Min.    | Max.  | Mean  | SD   | CV (%) | Skewness | Kurtoneess | $h_B^2$ (%) |
| KL (mm)  | E1           | 2017 | Deyang   | 6.95**   | 6.72  | 6.25    | 7.31  | 6.78  | 0.23 | 3.35   | -0.17    | -0.25      | 61.63       |
|          | E2           |      | Chengdu  | 6.97**   | 6.57  | 6.22    | 7.25  | 6.75  | 0.23 | 3.34   | -0.19    | -0.32      |             |
|          | E3           | 2018 | Deyang   | 7.41**   | 7.24  | 6.62    | 7.70  | 7.18  | 0.24 | 3.28   | -0.11    | -0.35      |             |
|          | E4           |      | Chengdu  | 7.19**   | 6.94  | 6.51    | 7.58  | 7.03  | 0.23 | 3.25   | -0.09    | -0.25      |             |
|          | E5           | 2019 | Deyang   | 7.39**   | 6.90  | 6.77    | 7.92  | 7.34  | 0.23 | 3.18   | -0.30    | -0.30      |             |
|          | E6           |      | Chengdu  | 7.24**   | 6.69  | 6.25    | 7.37  | 6.80  | 0.23 | 3.38   | -0.18    | -0.25      |             |
|          | E7           | 2020 | Deyang   | 7.22**   | 6.99  | 6.62    | 7.70  | 7.18  | 0.24 | 3.28   | -0.11    | -0.38      |             |
|          | E8           |      | Chengdu  | 7.18**   | 6.84  | 6.14    | 7.22  | 6.66  | 0.23 | 3.42   | -0.17    | -0.31      |             |
| KW (mm)  | E1           | 2017 | Deyang   | 3.25**   | 3.09  | 2.79    | 3.56  | 3.28  | 0.16 | 4.73   | -0.58    | -0.10      | 68.18       |
|          | E2           |      | Chengdu  | 3.31***  | 2.99  | 2.66    | 3.51  | 3.14  | 0.16 | 4.96   | -0.33    | 0.12       |             |
|          | E3           | 2018 | Deyang   | 3.66*    | 3.59  | 3.27    | 4.00  | 3.69  | 0.14 | 3.92   | -0.30    | -0.01      |             |
|          | E4           |      | Chengdu  | 3.35*    | 3.23  | 2.97    | 3.69  | 3.42  | 0.13 | 3.86   | -0.63    | 0.81       |             |
|          | E5           | 2019 | Deyang   | 3.59**   | 3.24  | 3.11    | 3.82  | 3.56  | 0.13 | 3.66   | -0.51    | 0.28       |             |
|          | E6           |      | Chengdu  | 3.57**   | 3.32  | 2.87    | 3.58  | 3.27  | 0.14 | 4.24   | -0.39    | 0.06       |             |
|          | E7           | 2020 | Deyang   | 3.33**   | 3.12  | 3.27    | 4.00  | 3.69  | 0.15 | 3.93   | -0.29    | -0.07      |             |
|          | E8           |      | Chengdu  | 3.21**   | 3.01  | 2.86    | 3.60  | 3.29  | 0.14 | 4.39   | -0.51    | 0.13       |             |
| KD (mm)  | E1           | 2017 | Deyang   | 4.78**   | 4.58  | 4.27    | 5.11  | 4.75  | 0.15 | 3.08   | -0.35    | 0.05       | 63.97       |
|          | E2           |      | Chengdu  | 4.84**   | 4.45  | 4.16    | 5.04  | 4.63  | 0.15 | 3.16   | -0.26    | 0.35       |             |
|          | E3           | 2018 | Deyang   | 5.16*    | 5.11  | 4.77    | 5.51  | 5.17  | 0.15 | 2.85   | 0.06     | -0.07      |             |
|          | E4           |      | Chengdu  | 4.85*    | 4.74  | 4.48    | 5.27  | 4.92  | 0.13 | 2.73   | -0.24    | 0.44       |             |
|          | E5           | 2019 | Deyang   | 5.13***  | 4.70  | 4.69    | 5.44  | 5.11  | 0.14 | 2.66   | -0.29    | -0.09      |             |
|          | E6           |      | Chengdu  | 5.13**   | 4.72  | 4.33    | 5.08  | 4.73  | 0.14 | 2.90   | -0.21    | -0.03      |             |
|          | E7           | 2020 | Deyang   | 5.11**   | 4.69  | 4.77    | 5.51  | 5.17  | 0.15 | 2.85   | 0.05     | -0.08      |             |
|          | E8           |      | Chengdu  | 5.09***  | 4.55  | 4.27    | 5.03  | 4.69  | 0.14 | 2.99   | -0.26    | -0.01      |             |
| KA (mm2) | E1           | 2017 | Deyang   | 18.47*** | 16.73 | 14.60   | 20.73 | 17.93 | 1.08 | 6.02   | -0.20    | -0.02      | 61.73       |
|          | E2           |      | Chengdu  | 18.69*** | 15.96 | 13.79   | 20.11 | 17.05 | 1.07 | 6.29   | -0.14    | 0.21       |             |
|          | E3           | 2018 | Deyang   | 21.17*** | 20.82 | 18.40   | 24.03 | 21.32 | 1.12 | 5.28   | 0.15     | -0.05      |             |
|          | E4           |      | Chengdu  | 19.03*** | 18.15 | 16.25   | 22.15 | 19.39 | 1.03 | 5.31   | -0.07    | 0.36       |             |
|          | E5           | 2019 | Deyang   | 20.95*** | 17.63 | 17.79   | 23.45 | 20.85 | 1.04 | 4.98   | -0.19    | -0.14      |             |
|          | E6           |      | Chengdu  | 20.82*** | 17.57 | 14.86   | 20.46 | 17.77 | 1.03 | 5.82   | -0.12    | -0.05      |             |
|          | E7           | 2020 | Deyang   | 20.91*** | 17.01 | 18.40   | 24.03 | 21.32 | 1.12 | 5.27   | 0.15     | -0.09      |             |
|          | E8           |      | Chengdu  | 20.23*** | 17.23 | 14.40   | 20.10 | 17.44 | 1.04 | 5.99   | -0.16    | -0.02      |             |

|         |    |      |         |          |       |       |       |       |      |      |       |       |       |
|---------|----|------|---------|----------|-------|-------|-------|-------|------|------|-------|-------|-------|
| KP (mm) | E1 | 2017 | Deyang  | 17.54*   | 16.86 | 15.96 | 18.51 | 17.25 | 0.50 | 2.91 | -0.11 | -0.14 | 60.92 |
|         | E2 |      | Chengdu | 17.63*   | 16.46 | 15.75 | 18.30 | 17.00 | 0.50 | 2.93 | -0.11 | -0.12 |       |
|         | E3 | 2018 | Deyang  | 18.51*   | 17.49 | 17.27 | 19.70 | 18.49 | 0.52 | 2.80 | 0.03  | -0.18 |       |
|         | E4 |      | Chengdu | 17.71*   | 17.02 | 16.65 | 19.10 | 17.86 | 0.50 | 2.78 | -0.01 | -0.06 |       |
|         | E5 | 2019 | Deyang  | 18.70**  | 17.27 | 17.43 | 19.76 | 18.59 | 0.50 | 2.71 | -0.21 | -0.25 |       |
|         | E6 |      | Chengdu | 18.51*** | 16.97 | 16.12 | 18.44 | 17.24 | 0.50 | 2.89 | -0.09 | -0.19 |       |
|         | E7 | 2020 | Deyang  | 18.33*   | 17.63 | 17.27 | 19.70 | 18.49 | 0.52 | 2.80 | 0.03  | -0.22 |       |
|         | E8 |      | Chengdu | 17.99*   | 17.54 | 15.90 | 18.24 | 17.08 | 0.50 | 2.91 | -0.11 | -0.24 |       |
| LWR     | E1 | 2017 | Deyang  | 2.22     | 2.22  | 1.83  | 2.42  | 2.09  | 0.12 | 5.85 | 0.54  | -0.16 | 87.87 |
|         | E2 |      | Chengdu | 2.15     | 2.25  | 1.93  | 2.50  | 2.18  | 0.12 | 5.68 | 0.26  | -0.38 |       |
|         | E3 | 2018 | Deyang  | 1.99     | 2.04  | 1.79  | 2.29  | 1.97  | 0.10 | 5.12 | 0.68  | 0.46  |       |
|         | E4 |      | Chengdu | 2.17     | 2.22  | 1.86  | 2.43  | 2.10  | 0.11 | 5.19 | 0.50  | 0.00  |       |
|         | E5 | 2019 | Deyang  | 2.10*    | 2.16  | 1.83  | 2.45  | 2.09  | 0.11 | 5.14 | 0.36  | 0.33  |       |
|         | E6 |      | Chengdu | 2.03     | 2.03  | 1.79  | 2.42  | 2.11  | 0.12 | 5.67 | 0.33  | 0.08  |       |
|         | E7 | 2020 | Deyang  | 2.17     | 2.24  | 1.79  | 2.29  | 1.97  | 0.10 | 5.12 | 0.67  | 0.39  |       |
|         | E8 |      | Chengdu | 2.24     | 2.27  | 1.78  | 2.41  | 2.07  | 0.12 | 5.89 | 0.48  | -0.04 |       |
| KRD     | E1 | 2017 | Deyang  | 0.47     | 0.46  | 0.42  | 0.56  | 0.49  | 0.03 | 5.78 | -0.24 | -0.41 | 87.32 |
|         | E2 |      | Chengdu | 0.47     | 0.46  | 0.41  | 0.53  | 0.47  | 0.03 | 5.89 | 0.01  | -0.47 |       |
|         | E3 | 2018 | Deyang  | 0.52     | 0.50  | 0.41  | 0.59  | 0.51  | 0.03 | 5.04 | -0.05 | 0.04  |       |
|         | E4 |      | Chengdu | 0.48     | 0.47  | 0.42  | 0.56  | 0.49  | 0.03 | 5.14 | -0.22 | -0.14 |       |
|         | E5 | 2019 | Deyang  | 0.48     | 0.47  | 0.45  | 0.57  | 0.52  | 0.03 | 4.85 | -0.34 | -0.08 |       |
|         | E6 |      | Chengdu | 0.50     | 0.50  | 0.42  | 0.58  | 0.49  | 0.03 | 5.77 | 0.00  | 0.15  |       |
|         | E7 | 2020 | Deyang  | 0.49     | 0.48  | 0.41  | 0.59  | 0.51  | 0.03 | 5.95 | -0.20 | 0.38  |       |
|         | E8 |      | Chengdu | 0.49     | 0.49  | 0.42  | 0.58  | 0.50  | 0.03 | 5.78 | -0.12 | -0.18 |       |
| FFD     | E1 | 2017 | Deyang  | 2.16*    | 1.94  | 1.73  | 2.35  | 2.08  | 0.13 | 6.16 | -0.79 | 0.34  | 68.33 |
|         | E2 |      | Chengdu | 2.13**   | 1.86  | 1.62  | 2.33  | 2.01  | 0.15 | 7.22 | -0.42 | -0.03 |       |
|         | E3 | 2018 | Deyang  | 2.05**   | 1.78  | 1.34  | 2.15  | 1.87  | 0.13 | 6.97 | -0.66 | 0.21  |       |
|         | E4 |      | Chengdu | 2.20**   | 2.00  | 1.88  | 2.34  | 2.14  | 0.09 | 4.04 | -0.32 | 0.03  |       |
|         | E5 | 2019 | Deyang  | 2.07**   | 1.82  | 1.60  | 2.05  | 1.83  | 0.08 | 4.48 | -0.13 | 0.00  |       |
|         | E6 |      | Chengdu | 2.22*    | 2.06  | 1.62  | 2.67  | 2.10  | 0.13 | 6.28 | 0.32  | 0.92  |       |
|         | E7 | 2020 | Deyang  | 2.30***  | 1.93  | 1.34  | 2.15  | 1.87  | 0.13 | 6.98 | -0.65 | 0.12  |       |
|         | E8 |      | Chengdu | 2.31***  | 1.95  | 1.65  | 2.30  | 2.04  | 0.14 | 6.71 | -0.58 | -0.03 |       |

Note:\*, \*\* and \*\*\* indicates the significance at 0.05, 0.01 and 0.001 level, respectively.

**Table S3** The loci detected by conditional QTL analysis in this study

| Traits | Conditional Loci | Environments              | Chromosome | Left Marker         | Right Marker        | LOD   | PVE(%) | Add   | Left CI | Right CI |
|--------|------------------|---------------------------|------------|---------------------|---------------------|-------|--------|-------|---------|----------|
| KA KL  | <i>Locus1</i>    | E1,E2,E4,E6,E7,B          | 3D         | <i>AX-110234451</i> | <i>AX-108754018</i> | 4.54  | 8.64   | 0.25  | 0.00    | 6.50     |
|        | <i>Locus2</i>    | E1,E2,E3,E4,E5,E8,B       | 4B         | <i>AX-94790546</i>  | <i>AX-111176263</i> | 6.13  | 10.49  | -0.28 | 13.50   | 20.50    |
|        | <i>Locus3</i>    | E1,E2,E3,E4,E5,E8,B       | 4D         | <i>AX-108905056</i> | <i>AX-111677925</i> | 5.67  | 15.06  | 0.33  | 6.50    | 10.50    |
|        | <i>Locus4</i>    | E1,E3,E4,E6,E8,B          | 6A         | <i>AX-109932158</i> | <i>AX-110637693</i> | 4.02  | 6.85   | 0.22  | 37.50   | 42.50    |
| KA KW  | <i>Locus5</i>    | E6                        | 1B         | <i>AX-110378973</i> | <i>AX-110526568</i> | 17.29 | 18.86  | 0.37  | 47.50   | 48.50    |
|        | <i>Locus6</i>    | E2, E3, E6, B             | 3B         | <i>AX-108855934</i> | <i>AX-109984220</i> | 4.15  | 5.05   | -0.17 | 79.50   | 81.00    |
|        | <i>Locus7</i>    | E3,E4,E5,E6,B             | 3D         | <i>AX-110950126</i> | <i>AX-109730385</i> | 6.99  | 9.43   | -0.23 | 8.50    | 16.50    |
|        | <i>Locus8</i>    | E1                        | 5A         | <i>AX-110587222</i> | <i>AX-109375147</i> | 3.44  | 3.07   | 0.15  | 0.00    | 6.50     |
|        | <i>Locus9</i>    | E3                        | 6A         | <i>AX-94446180</i>  | <i>AX-108734124</i> | 30.41 | 22.00  | -0.57 | 2.50    | 3.50     |
|        | <i>Locus10</i>   | E6                        | 6A         | <i>AX-110955892</i> | <i>AX-111727948</i> | 4.02  | 4.63   | 0.18  | 52.50   | 54.50    |
|        | <i>Locus11</i>   | E2, E3, E5, E6, B         | 6D2        | <i>AX-110261831</i> | <i>AX-109845133</i> | 5.38  | 6.40   | 0.20  | 3.50    | 11.50    |
|        | <i>Locus12</i>   | E2                        | 4B         | <i>AX-108828132</i> | <i>AX-110103911</i> | 11.38 | 11.39  | 0.04  | 28.50   | 29.50    |
| KA KD  | <i>Locus13</i>   | E2                        | 4B         | <i>AX-109368728</i> | <i>AX-111046577</i> | 5.61  | 5.29   | -0.03 | 34.50   | 40.50    |
|        | <i>Locus14</i>   | E2,E3,E4,E5,E6,E7,E8,B    | 3D         | <i>AX-110234451</i> | <i>AX-108891293</i> | 4.06  | 6.18   | 0.05  | 0.00    | 3.50     |
| KP KL  | <i>Locus15</i>   | E3,E4,E5,E6,E7,B          | 4A         | <i>AX-110046592</i> | <i>AX-111045592</i> | 3.67  | 5.04   | 0.04  | 31.50   | 32.50    |
|        | <i>Locus16</i>   | E1,E2,E3,E4,E5,E6,E7,E8,B | 4B         | <i>AX-94790546</i>  | <i>AX-109294476</i> | 8.51  | 12.44  | -0.07 | 13.50   | 17.50    |
|        | <i>Locus17</i>   | E1,E2,E3,E4,E5,E6,E7,E8,B | 4D         | <i>AX-108905056</i> | <i>AX-111677925</i> | 8.02  | 17.31  | 0.08  | 7.50    | 9.50     |
|        | <i>Locus18</i>   | E1,E2,E3,E4,E5,E6,E7,E8,B | 6A         | <i>AX-109932158</i> | <i>AX-110637693</i> | 5.23  | 7.36   | 0.05  | 37.50   | 42.50    |
|        | <i>Locus19</i>   | E4, E7                    | 7A         | <i>AX-109892640</i> | <i>AX-111651884</i> | 3.52  | 4.70   | -0.04 | 63.50   | 69.50    |
|        | <i>Locus20</i>   | E6,E7                     | 2A         | <i>AX-109434737</i> | <i>AX-111042596</i> | 4.59  | 4.42   | -0.12 | 0.00    | 5.50     |
| KP KW  | <i>Locus21</i>   | E2, E3, E6, B             | 3B         | <i>AX-108855934</i> | <i>AX-109984220</i> | 4.07  | 2.93   | -0.12 | 79.50   | 81.00    |
|        | <i>Locus22</i>   | E1,E2,E3,E4,E5,E6,E7,B    | 3D         | <i>AX-109431678</i> | <i>AX-110950126</i> | 9.89  | 6.61   | -0.19 | 12.50   | 15.50    |
|        | <i>Locus23</i>   | E7,E8                     | 4B         | <i>AX-110925399</i> | <i>AX-109385774</i> | 3.48  | 7.57   | 0.12  | 24.50   | 25.50    |

|        |                |                           |     |                     |                     |       |       |       |       |       |
|--------|----------------|---------------------------|-----|---------------------|---------------------|-------|-------|-------|-------|-------|
| KP KD  | <i>Locus24</i> | E2,E3,E4,E5,E7,B          | 6A  | <i>AX-94446180</i>  | AX-108734124        | 31.76 | 19.52 | -0.40 | 2.50  | 3.50  |
|        | <i>Locus25</i> | E6                        | 6A  | <i>AX-110955892</i> | AX-111727948        | 4.76  | 7.33  | 0.13  | 51.50 | 54.50 |
|        | <i>Locus26</i> | E1,E2,E3,E4,E5,E6,E7,B    | 6D2 | <i>AX-109447460</i> | AX-109845133        | 7.43  | 4.82  | 0.16  | 6.50  | 11.50 |
|        | <i>Locus27</i> | E1,E2                     | 2A  | <i>AX-110433540</i> | <i>AX-110904713</i> | 4.43  | 9.20  | -0.07 | 1.50  | 3.50  |
|        | <i>Locus28</i> | E5,E6,E7                  | 2A  | <i>AX-110433540</i> | <i>AX-110904713</i> | 3.67  | 7.71  | -0.06 | 0.00  | 3.50  |
|        | <i>Locus29</i> | E1,E2,E3,E4,E5,E6,E7,E8,B | 3D  | <i>AX-110234451</i> | <i>AX-111159927</i> | 6.16  | 14.24 | -0.08 | 0.00  | 10.50 |
| LWR KD | <i>Locus30</i> | E1,E2,E3,E4,E5,E6,E7,E8,B | 4B  | <i>AX-109909153</i> | <i>AX-110938398</i> | 4.08  | 9.05  | 0.07  | 20.50 | 24.50 |
|        | <i>Locus31</i> | E3,E4,E5,E6,E7,B          | 6A  | <i>AX-94446180</i>  | <i>AX-108734124</i> | 3.91  | 8.35  | -0.06 | 2.50  | 3.50  |
|        | <i>Locus32</i> | E7                        | 2A  | <i>AX-111042596</i> | <i>AX-110433540</i> | 6.11  | 12.65 | -0.04 | 1.50  | 3.50  |
|        | <i>Locus33</i> | E1,E2,E3,E4,E5,E6,E7,E8,B | 3D  | <i>AX-110234451</i> | <i>AX-110950126</i> | 6.33  | 13.28 | -0.04 | 0.00  | 15.50 |
|        | <i>Locus34</i> | E1,E2,E3,E4,E5,E6,E7,E8,B | 4B  | <i>AX-109909153</i> | <i>AX-110938398</i> | 5.47  | 11.06 | 0.04  | 20.50 | 24.50 |
|        | <i>Locus35</i> | E3,36,B                   | 5A  | <i>AX-110587222</i> | <i>AX-109375147</i> | 4.33  | 8.94  | 0.03  | 0.00  | 8.50  |
| LWR KL | <i>Locus36</i> | E1                        | 6D2 | <i>AX-89564650</i>  | <i>AX-108802393</i> | 3.90  | 9.02  | 0.03  | 41.50 | 47.50 |
|        | <i>Locus37</i> | E2,E3,E4,E5,E6,B          | 3D  | <i>AX-108894108</i> | <i>AX-108754018</i> | 4.70  | 8.26  | -0.03 | 0.00  | 6.50  |
|        | <i>Locus38</i> | E7                        | 4A  | <i>AX-110046592</i> | <i>AX-111045592</i> | 3.48  | 3.84  | -0.02 | 31.50 | 32.50 |
|        | <i>Locus39</i> | E1,E2,E3,E4,E6,E7,E8,B    | 4B  | <i>AX-109294476</i> | <i>AX-111176263</i> | 7.37  | 12.69 | 0.04  | 13.50 | 20.50 |
|        | <i>Locus40</i> | E1,E2,E4,E5,E6,E7,E8,B    | 4D  | <i>Rht2</i>         | <i>AX-108905056</i> | 6.92  | 12.71 | -0.04 | 30.50 | 47.50 |
|        | <i>Locus41</i> | E3                        | 5D  | <i>AX-89591395</i>  | <i>AX-111019979</i> | 4.35  | 8.07  | -0.03 | 96.50 | 97.50 |
| LWR KW | <i>Locus42</i> | E2,B                      | 6A  | <i>AX-110955892</i> | <i>AX-110396610</i> | 3.78  | 5.99  | -0.03 | 48.50 | 50.50 |
|        | <i>Locus43</i> | E7                        | 2A  | <i>AX-111042596</i> | <i>AX-110433540</i> | 3.54  | 9.34  | -0.03 | 0.00  | 3.50  |
|        | <i>Locus44</i> | E6                        | 3A2 | <i>AX-111083928</i> | <i>AX-109904743</i> | 4.06  | 6.87  | 0.02  | 3.50  | 4.50  |
|        | <i>Locus45</i> | E1,E3                     | 3B  | <i>AX-108855934</i> | <i>AX-109984220</i> | 4.43  | 7.27  | -0.02 | 79.50 | 81.00 |
|        | <i>Locus46</i> | E1,E3,E5,E6               | 3D  | <i>AX-110950126</i> | <i>AX-109730385</i> | 5.49  | 11.00 | -0.03 | 12.50 | 17.50 |
|        | <i>Locus47</i> | E2,E4,E6,E8,B             | 4B  | <i>AX-110925399</i> | <i>AX-109385774</i> | 4.66  | 8.57  | 0.03  | 23.50 | 25.50 |
|        | <i>Locus48</i> | E6                        | 5A  | <i>AX-110587222</i> | <i>AX-109375147</i> | 3.86  | 6.41  | 0.02  | 0.00  | 6.50  |
|        | <i>Locus49</i> | E3                        | 6A  | <i>AX-110955892</i> | <i>AX-110396610</i> | 3.57  | 4.91  | 0.02  | 48.50 | 50.50 |

|        |                |                           |     |                     |                     |       |       |        |       |       |
|--------|----------------|---------------------------|-----|---------------------|---------------------|-------|-------|--------|-------|-------|
| KRD KL | <i>Locus50</i> | E1,E3,E6                  | 6D2 | <i>AX-110261831</i> | <i>A014803</i>      | 5.06  | 8.50  | 0.02   | 3.50  | 12.50 |
|        | <i>Locus51</i> | E8                        | 6D2 | <i>AX-110425031</i> | <i>AX-89576368</i>  | 39.62 | 15.38 | 0.10   | 34.50 | 36.50 |
|        | <i>Locus52</i> | E2,E4,E7,E8,B             | 3D  | <i>AX-110234451</i> | <i>AX-108754018</i> | 4.78  | 8.35  | 0.01   | 0.00  | 6.50  |
|        | <i>Locus53</i> | E1,E2,E3,E4,E6,E7,E8,B    | 4B  | <i>AX-109294476</i> | <i>AX-111176263</i> | 6.78  | 11.92 | -0.01  | 13.50 | 20.50 |
|        | <i>Locus54</i> | E1,E2,E4,E6,E7,E8,B       | 4D  | <i>Rht2</i>         | <i>AX-108905056</i> | 7.29  | 13.66 | 0.01   | 30.50 | 45.50 |
| KRD KW | <i>Locus55</i> | E,E2,B                    | 6A  | <i>AX-110955892</i> | <i>AX-110396610</i> | 4.64  | 7.62  | 0.01   | 48.50 | 50.50 |
|        | <i>Locus56</i> | E4                        | 1A  | <i>AX-110963581</i> | <i>AX-108804089</i> | 4.93  | 8.30  | 0.01   | 0.00  | 2.50  |
|        | <i>Locus57</i> | E4                        | 2A  | <i>AX-111041231</i> | <i>AX-109431101</i> | 5.35  | 9.16  | 0.01   | 3.50  | 5.50  |
|        | <i>Locus58</i> | E6                        | 3A2 | <i>AX-111083928</i> | <i>AX-109904743</i> | 3.64  | 5.68  | -0.01  | 3.50  | 4.50  |
|        | <i>Locus59</i> | E5,E6,B                   | 3D  | <i>AX-110950126</i> | <i>AX-109730385</i> | 6.17  | 9.85  | 0.01   | 12.50 | 16.50 |
| KRD KD | <i>Locus60</i> | E2,E8                     | 4B  | <i>AX-109909153</i> | <i>AX-110938398</i> | 4.03  | 10.67 | -0.006 | 20.50 | 25.50 |
|        | <i>Locus61</i> | E4                        | 4D  | <i>AX-111494342</i> | <i>Rht2</i>         | 4.23  | 9.12  | -0.01  | 24.50 | 35.50 |
|        | <i>Locus62</i> | E6                        | 5A  | <i>AX-110587222</i> | <i>AX-109375147</i> | 4.48  | 7.16  | -0.01  | 0.00  | 5.50  |
|        | <i>Locus63</i> | E5,E6,B                   | 6D2 | <i>AX-110261831</i> | <i>A014803</i>      | 4.99  | 8.00  | -0.01  | 4.50  | 9.50  |
|        | <i>Locus64</i> | E4,B                      | 2A  | <i>AX-111042596</i> | <i>AX-110433540</i> | 4.62  | 9.40  | 0.01   | 1.50  | 3.50  |
| FFD KL | <i>Locus65</i> | E2                        | 2D  | <i>AX-86176809</i>  | <i>AX-109998182</i> | 4.71  | 7.05  | -0.01  | 68.50 | 69.50 |
|        | <i>Locus66</i> | E1,E2,E3,E4,E5,E6,E7,E8,B | 3D  | <i>AX-110234451</i> | <i>AX-110950126</i> | 7.57  | 14.00 | 0.01   | 0.00  | 14.50 |
|        | <i>Locus67</i> | E1,E2,E3,E4,E6,E7,E8,B    | 4B  | <i>AX-109909153</i> | <i>AX-110938398</i> | 5.60  | 10.32 | -0.01  | 13.50 | 24.50 |
|        | <i>Locus68</i> | E7                        | 4D  | <i>Rht2</i>         | <i>AX-108905056</i> | 4.06  | 7.69  | 0.01   | 31.50 | 45.50 |
|        | <i>Locus69</i> | E6                        | 4D  | <i>AX-108852200</i> | <i>AX-108741322</i> | 4.25  | 6.27  | 0.01   | 53.50 | 57.50 |
| FFD KL | <i>Locus70</i> | E3,E6,E8,B                | 5A  | <i>AX-110587222</i> | <i>AX-109375147</i> | 4.29  | 8.18  | -0.01  | 0.00  | 9.50  |
|        | <i>Locus71</i> | E2                        | 5A  | <i>AX-111275814</i> | <i>AX-109940010</i> | 4.42  | 6.31  | 0.01   | 59.50 | 60.50 |
|        | <i>Locus72</i> | E7                        | 6A  | <i>AX-109905050</i> | <i>AX-109509808</i> | 3.67  | 5.74  | 0.01   | 3.50  | 4.50  |
|        | <i>Locus73</i> | E6                        | 6D2 | <i>AX-109447460</i> | <i>AX-109845133</i> | 4.23  | 5.90  | -0.01  | 9.50  | 12.50 |
|        | <i>Locus74</i> | E2                        | 7A  | <i>AX-108744494</i> | <i>AX-110529210</i> | 3.94  | 7.02  | -0.01  | 84.50 | 93.50 |
|        | <i>Locus75</i> | E4                        | 3B  | <i>AX-109911340</i> | <i>AX-111536910</i> | 4.00  | 9.36  | 0.03   | 75.50 | 77.50 |

|        |                |            |    |                     |                     |       |       |       |       |       |
|--------|----------------|------------|----|---------------------|---------------------|-------|-------|-------|-------|-------|
|        | <i>Locus76</i> | E1,E2,B    | 4B | <i>AX-109294476</i> | <i>AX-111176263</i> | 6.29  | 11.33 | -0.04 | 15.50 | 22.50 |
|        | <i>Locus77</i> | E1,E2,E7,B | 4D | <i>Rht2</i>         | <i>AX-108905056</i> | 5.09  | 11.18 | 0.05  | 31.50 | 48.50 |
|        | <i>Locus78</i> | B          | 5D | <i>AX-108760983</i> | <i>AX-111723433</i> | 3.73  | 8.68  | -0.03 | 93.50 | 94.50 |
|        | <i>Locus79</i> | E2,B       | 6A | <i>AX-110955892</i> | <i>AX-110396610</i> | 4.62  | 7.47  | 0.04  | 48.50 | 50.50 |
| FFD KW | <i>Locus80</i> | E1         | 2A | <i>AX-111042596</i> | <i>AX-110433540</i> | 8.53  | 21.64 | 0.03  | 2.50  | 3.50  |
|        | <i>Locus81</i> | B          | 2D | <i>AX-109449257</i> | <i>AX-110411457</i> | 4.35  | 8.16  | -0.02 | 74.50 | 76.50 |
|        | <i>Locus82</i> | E2         | 4B | <i>AX-109909153</i> | <i>AX-110938398</i> | 3.67  | 7.47  | -0.03 | 20.50 | 24.50 |
|        | <i>Locus83</i> | B          | 5D | <i>AX-108760983</i> | <i>AX-111723433</i> | 4.84  | 13.69 | -0.02 | 93.50 | 94.50 |
| FFD KD | <i>Locus84</i> | E1,E8,B    | 2A | <i>AX-111042596</i> | <i>AX-110433540</i> | 4.95  | 9.38  | 0.03  | 1.50  | 3.50  |
|        | <i>Locus85</i> | B          | 3B | <i>AX-108855934</i> | <i>AX-109984220</i> | 3.78  | 10.03 | 0.02  | 79.50 | 81.00 |
|        | <i>Locus86</i> | E2         | 3D | <i>AX-110234451</i> | <i>AX-108891293</i> | 3.63  | 6.48  | 0.03  | 0.00  | 2.50  |
|        | <i>Locus87</i> | E1,E2      | 4B | <i>AX-109909153</i> | <i>AX-110938398</i> | 11.23 | 20.07 | -0.07 | 20.50 | 24.50 |
|        | <i>Locus88</i> | E2         | 4D | <i>Rht2</i>         | <i>AX-108905056</i> | 3.54  | 6.62  | 0.03  | 29.50 | 43.50 |
|        | <i>Locus89</i> | E8         | 7B | <i>AX-94611818</i>  | <i>AX-109976283</i> | 5.34  | 11.17 | 0.05  | 76.50 | 80.50 |

**Table S4** Genotypes for R3D, R4B and R6D2 using KASP marker in global cultivars

| Varieties   | Countries | R3D | R4B.1 | R6D2 |
|-------------|-----------|-----|-------|------|
| Xiaoyan315  | China     | A   | B     | A    |
| Pubing151   | China     | A   | A     | A    |
| Pubing04-1  | China     | B   | X     | A    |
| Pubing04-2  | China     | X   | X     | A    |
| Pubing3504  | China     | A   | B     | B    |
| Yunhan102   | China     | A   | B     | A    |
| Changhang1  | China     | A   | X     | A    |
| Pubing2011  | China     | X   | B     | B    |
| Hangyangmai | China     | B   | A     | A    |
| Xiaoyan22   | China     | A   | B     | B    |

---

|             |       |   |   |   |
|-------------|-------|---|---|---|
| Zhongyu1428 | China | A | B | A |
| Xinmai8171  | China | A | A | B |
| Xinong360   | China | B | X | A |
| Zheng9023   | China | B | A | A |
| Zheng7698   | China | A | B | A |
| Jimai36     | China | A | A | A |
| Guojiamai15 | China | B | B | A |
| Jimai22     | China | A | A | A |
| Xinong979   | China | B | X | A |
| Xinong589   | China | A | X | A |
| Zhoumai40   | China | B | X | B |
| Hemai1301   | China | A | A | A |
| Jindi166    | China | A | A | A |
| Xinong622   | China | B | X | X |
| Xianmai99   | China | B | B | A |
| Zhongyu9331 | China | A | A | A |
| Zhumai328   | China | A | X | A |
| Hua2132     | China | B | B | A |
| Hua2667     | China | B | B | A |
| Xinong189   | China | A | A | A |
| Zimai12     | China | A | X | A |
| Bainong207  | China | A | X | A |
| Ronghua188  | China | B | X | B |
| Xinong285   | China | B | A | A |
| Huamai0981  | China | X | A | B |
| Hua1315     | China | B | X | A |
| Tainong2987 | China | A | A | A |
| Zhengmai119 | China | A | X | A |



---

|               |       |   |   |   |
|---------------|-------|---|---|---|
| JiyanmaiC6047 | China | B | A | B |
| Xinong733     | China | A | X | A |
| Fannong6      | China | A | A | A |
| Xinnong23     | China | B | X | A |
| Zhengmai103   | China | A | X | B |
| Zhengmai004   | China | A | A | B |
| Jimai52       | China | A | A | A |
| Yannong1212   | China | A | A | A |
| Xianmai10     | China | A | B | A |
| Hua2820       | China | A | A | A |
| Nongda5738    | China | A | A | A |
| Nongda5758    | China | X | B | B |
| Xinmai29      | China | A | X | A |
| Zhoumai22     | China | B | B | A |
| Deyan0516     | China | B | B | A |
| Hefeng3       | China | A | A | A |
| Chuangmai58   | China | B | X | A |
| Zhengpinmai25 | China | B | B | A |
| Saidemai601   | China | B | B | A |
| Tianmin366    | China | A | A | A |
| Xuyan5        | China | X | B | A |
| Zhengmai16    | China | A | X | A |
| Jimai44       | China | B | X | A |
| Jimai55       | China | A | A | A |
| Saidemai17    | China | B | B | A |
| Pumai1165     | China | B | X | B |
| Xinong592     | China | B | A | B |
| Zheng9405     | China | A | X | A |

---

|               |       |   |   |   |
|---------------|-------|---|---|---|
| Xinong916     | China | A | X | A |
| Xinong235     | China | X | B | A |
| Keda109       | China | B | A | A |
| Xinong113     | China | B | A | A |
| Xinong66      | China | A | A | A |
| Zhongmai698   | China | A | X | A |
| Xinong162     | China | A | A | A |
| Zhengmai162   | China | A | B | A |
| Xinong511     | China | A | X | A |
| Annong1124    | China | A | X | B |
| Luomai33      | China | A | X | A |
| Zhoumai32     | China | A | A | A |
| Fengdecunmai5 | China | B | B | A |
| Zhoumai30     | China | A | A | A |
| Yuanfeng175   | China | B | B | B |
| Zhoumai28     | China | B | X | B |
| Yumai34       | China | A | A | A |
| Neimai11      | China | A | B | B |
| Yangmai2      | China | B | X | A |
| Yangmai1      | China | B | B | A |
| Yunmai53      | China | A | B | A |
| Yangfumai2    | China | A | B | A |
| Yunmai57      | China | X | X | B |
| Zhongmai166   | China | B | X | A |
| Yangmai22     | China | A | A | A |
| Tianshui08-3  | China | A | B | A |
| Chuannong29   | China | B | B | B |
| Chuanfu8      | China | B | B | B |

---

|              |       |   |   |   |
|--------------|-------|---|---|---|
| Chuanlanmai1 | China | A | X | A |
| Chuanmai104  | China | A | X | B |
| Chuanmai42   | China | A | B | B |
| Chuanmai43   | China | A | X | X |
| Chuanmai64   | China | A | A | B |
| Chuanmai82   | China | A | B | B |
| Neimai8      | China | A | B | B |
| Mianyang24   | China | A | B | A |
| Mianyang30   | China | A | B | A |
| Shumai830    | China | B | X | B |
| Shumai114    | China | A | X | B |
| Shumai133    | China | B | A | B |
| Kechengmai1  | China | B | B | B |
| Lantian22    | China | A | B | A |
| Lantian26    | China | B | A | A |
| Maimai367    | China | A | A | B |
| Chuanmai93   | China | B | B | B |
| Chuannong12  | China | B | A | B |
| Chuannong19  | China | B | X | A |
| Chuannong21  | China | A | A | A |
| Chuanyu20    | China | A | A | A |
| Chuanyu23    | China | B | A | B |
| Chuanyu29    | China | B | X | B |
| Fan6         | China | B | X | B |
| Mianmai1403  | China | B | B | B |
| Mianmai315   | China | A | B | A |
| Xikemai4     | China | B | X | A |
| Shumai969    | China | A | X | A |

---

|               |       |   |   |   |
|---------------|-------|---|---|---|
| Shumai1609    | China | B | A | B |
| Chuanmai98    | China | B | A | A |
| Chuanmai901   | China | A | B | B |
| CD015-1237-2  | China | A | A | A |
| CD015-1264-1  | China | A | A | A |
| Kemai2939     | China | A | X | B |
| Chuanmai36    | China | A | X | A |
| Shumai3       | China | X | B | A |
| Chuannong32   | China | B | X | A |
| Yumai1        | China | B | B | B |
| Shumai1661    | China | X | X | X |
| Chuanyu26     | China | B | B | B |
| Shumai580     | China | A | B | A |
| Kechengmai4   | China | B | B | A |
| Guixie4       | China | A | A | A |
| Mianmai905    | China | A | X | A |
| Zhongmai578   | China | A | X | A |
| Chuannong16   | China | A | A | B |
| Mianmai51     | China | A | A | A |
| CS            | China | B | B | B |
| Chuannong33   | China | B | A | B |
| Zimai1        | China | A | B | B |
| Zimai2        | China | A | A | A |
| Lantian34     | China | X | X | A |
| Lantian35     | China | A | A | A |
| Lantian19     | China | A | B | A |
| Zhongkemai169 | China | B | X | B |
| Zhongkemai10  | China | A | A | B |

---

|                 |       |   |   |   |
|-----------------|-------|---|---|---|
| Shumai691       | China | A | B | B |
| Neimai101       | China | A | A | B |
| Mianzimai830    | China | X | B | A |
| Mianyangnong    | China | X | A | A |
| Chuanyu38       | China | A | A | A |
| Xikemai518      | China | A | B | B |
| Chengshixinmai3 | China | B | B | B |
| Mianmai45       | China | X | X | A |
| Mianyang11      | China | X | X | A |
| Mianmai185      | China | A | X | A |
| Chuanyu16       | China | A | A | A |
| Chongzu104      | China | A | X | B |
| Zhongkemai17    | China | A | B | A |
| Zhongkemai18    | China | A | B | A |
| Zhongkemai36    | China | A | X | X |
| Chuanyu12       | China | A | X | B |
| Zhongkemai138   | China | A | A | A |
| Mianmai37       | China | A | X | B |
| Chuanmai30      | China | A | X | A |
| Chuanmai107     | China | B | X | B |
| Chuanmai28      | China | B | B | B |
| Chuannong27     | China | B | X | B |
| Chuanmai44      | China | B | B | A |
| Chuanyu42       | China | A | A | B |
| Xiaobingmai33   | China | B | X | A |
| Xichang18       | China | B | A | A |
| Zhongmai133     | China | B | X | A |
| Tianxuan43      | China | A | X | A |

---

|                     |           |   |   |   |
|---------------------|-----------|---|---|---|
| Xiaoguan54          | China     | B | X | A |
| Changbai251         | China     | A | X | A |
| Mangmai1            | China     | A | X | A |
| 12Z37               | China     | X | B | A |
| Xinggang1958        | China     | A | X | A |
| Zhongyou206         | China     | A | B | A |
| Luokang2            | China     | A | A | A |
| Shicaomai4071       | China     | A | B | A |
| Mahon               | Algeria   | A | A | A |
| Improved Steinwedel | Australia | A | X | A |
| Aussie              | Australia | A | A | A |
| Sultan              | Australia | A | B | A |
| Sunset              | Australia | A | A | A |
| Ford                | Australia | A | A | A |
| Fife                | Australia | B | A | A |
| Early Bird          | Australia | B | A | A |
| Majestic            | Australia | A | A | A |
| Rajah               | Australia | A | X | A |
| Cedar               | Australia | X | A | B |
| Union               | Australia | A | X | A |
| Waratah             | Australia | A | X | A |
| Canberra            | Australia | A | B | A |
| Exquisite           | Australia | A | A | A |
| Duchess             | Australia | A | A | A |
| Bebrovo             | Bulgaria  | A | A | A |
| Constantin          | Bulgaria  | A | A | A |
| Golema Franga       | Bulgaria  | A | A | A |
| Shan wheat          | Burma     | A | B | A |

---

|                        |        |   |   |   |
|------------------------|--------|---|---|---|
| 2193/20-12             | Burma  | B | X | A |
| 2193/20-14             | Burma  | A | X | X |
| Blé mavratheri         | Crete  | A | B | A |
| Blé cheliostazo        | Crete  | A | B | A |
| Psathas                | Cyprus | B | A | A |
| Asprokoutsoullon       | Cyprus | B | X | A |
| Alliés                 | France | A | A | A |
| Vilmorin 29            | France | A | A | A |
| P.M.L.1                | France | A | A | A |
| Carré Géant blanc      | France | A | B | A |
| Bladette de Besplas    | France | A | A | A |
| Rouge de St-Laud       | France | A | A | A |
| Roux de Presles        | France | A | A | A |
| Rouge des Ardennes     | France | B | X | A |
| Way                    | France | A | B | A |
| Wilson jaune           | France | A | A | A |
| Rouge de Bordeaux      | France | A | A | A |
| Parsel                 | France | A | X | A |
| Blé Seigle             | France | A | X | A |
| Saissette de Maninet P | France | B | B | A |
| Maylin                 | France | A | A | A |
| Deve                   | Greece | A | X | A |
| Trigonostaro           | Greece | A | A | A |
| Hokino                 | Greece | A | A | A |
| Vardarka Chervenaka    | Greece | A | A | A |
| Asprotheri             | Greece | A | B | A |
| Zulitsa                | Greece | B | A | A |
| Arnaout                | Greece | A | A | A |

---

|                    |        |   |   |   |
|--------------------|--------|---|---|---|
| Karabash           | Greece | X | A | B |
| Pusa 90            | India  | A | A | A |
| Gangajali          | India  | A | A | A |
| Dolatkhani (white) | India  | A | A | A |
| Pusa 4             | India  | B | A | A |
| Rodi Garamseli     | India  | A | A | A |
| Pashmak            | India  | A | B | A |
| Federation         | India  | A | A | A |
| Thori (beardless)  | India  | A | A | A |
| Phundi             | India  | A | A | A |
| Ka                 | India  | B | A | A |
| Bhawarwall         | India  | A | X | A |
| Boojri             | India  | A | A | A |
| Boojri (bearded)   | India  | A | X | A |
| Pusa 52            | India  | B | B | A |
| Lalia              | India  | A | X | A |
| White Murga        | India  | B | A | A |
| White Tikoria      | India  | B | B | A |
| Dehak              | India  | A | X | A |
| Lyallpur 14        | India  | A | A | A |
| Setwa              | India  | B | B | B |
| Sur                | India  | A | B | A |
| Soor Ghanum        | India  | A | B | B |
| Lyallpur 10        | India  | B | A | B |
| Desi White         | India  | A | A | A |
| Spin               | India  | B | X | A |
| Lalia Desi         | India  | B | A | B |
| Dandi              | India  | A | B | B |



---

|                                     |       |   |   |   |
|-------------------------------------|-------|---|---|---|
| Sambhoria (Lalwali Wala)            | India | B | X | A |
| Dehak Panjabi                       | India | A | B | A |
| Samna                               | India | A | B | B |
| Punjab 8A                           | India | A | A | A |
| Kaghzi Desi                         | India | B | A | A |
| Lyallpur 11                         | India | B | X | A |
| Lyallpur 8A                         | India | B | B | A |
| Walaiti (Mastung wheat)             | India | A | X | A |
| C.                                  | India | A | A | B |
| Thori                               | India | X | A | A |
| Sufed Panjabi                       | India | A | A | A |
| Desi                                | India | A | A | A |
| Gahu (Nepali) or Kyo<br>(Sikkimese) | India | A | B | A |
| Pusa 6                              | India | B | B | A |
| Lalmi                               | India | A | X | B |
| Abi                                 | India | A | A | A |
| Pusa 80-5                           | India | A | B | A |
| Malo                                | India | A | X | A |
| Mundia                              | India | B | X | A |
| Autumn wheat                        | Iran  | A | A | B |
| Razan Ferahan                       | Iran  | A | X | A |
| Kerbelai Ali Khani                  | Iran  | B | A | A |
| Sarakhs                             | Iran  | A | A | A |
| Sarakh                              | Iran  | A | A | A |
| Kal                                 | Iran  | A | A | A |
| Sari Boghda                         | Iran  | B | X | A |
| Serabend                            | Iran  | A | A | A |
| Safid                               | Iran  | A | X | A |

---

|                                   |           |   |   |   |
|-----------------------------------|-----------|---|---|---|
| Zardak-i-Harrami                  | Iran      | B | A | A |
| Khal Kirmiz                       | Iran      | A | X | A |
| Ab Mahi                           | Iran      | B | X | A |
| Qizilqin Boghda                   | Iran      | B | B | A |
| Khusheh Safid                     | Iran      | A | X | A |
| Vilayati                          | Iran      | A | B | A |
| Sukh Das                          | Iran      | A | B | A |
| Ma'aunch                          | Iran      | B | A | A |
| Gandum-i-Jiruft                   | Iran      | B | B | B |
| Muganka x Belokoloska             | Iran      | A | B | A |
| Rustam Exp Farm 99                | Iraq      | B | X | B |
| Kandhari, Rustam Exp Farm 859     | Iraq      | A | A | A |
| Humairah, Rustam Exp Farm 595     | Iraq      | B | A | A |
| Rustam Exp Farm 79                | Iraq      | B | A | A |
| Rustam Exp Farm 171               | Iraq      | A | A | A |
| Mairca di Pali, Flaksberger 19341 | Italy     | A | B | A |
| Gentil Rossa, Flaksberger 19927   | Italy     | A | B | A |
| Decimomanna, Flaksberger 20119    | Italy     | A | A | A |
| Edda                              | Italy     | A | A | A |
| Piccolo                           | Italy     | A | B | A |
| Mahan                             | Morocco   | A | A | A |
| Mughari                           | Palestine | B | A | A |
| Abu Fashi                         | Palestine | B | A | A |
| Wysololitewka Sobieszynska        | Poland    | A | A | A |
| Trigo preto rijo                  | Poland    | B | A | A |
| Bialy Krzyz Ryxa                  | Poland    | X | X | A |
| Kolben Heinego                    | Poland    | A | A | A |

---

|                            |        |   |   |   |
|----------------------------|--------|---|---|---|
| Kujawianka    Wieclawicka  | Poland | A | B | A |
| Superelekta Kleszczynskich | Poland | A | A | A |
| Extra Kolben Heinego       | Poland | X | A | A |
| Surka Cezostna             | Poland | B | A | A |
| Ostka Wieclawicka          | Poland | A | A | A |
| Ostka Skomoroska           | Poland | B | B | A |
| Hors Concurs               | Poland | A | A | A |
| Zlotka Miczynskiego        | Poland | B | B | B |

---
